# Supplementary material for: Oregano powder reduces Streptococcus and increases SCFA concentration in a mixed bacterial culture assay
Source: PubMed Central journal article supplement (PMC6903721; doi:10.1371/journal.pone.0216853), 2019-12-10
Supplement: pone.0216853.s001.pdf [file pone.0216853.s001.pdf]

# **Oregano powder reduces *Streptococcus* and increases SCFA concentration in a mixed bacterial culture assay**

Benjamin W Bauer<sup>1</sup>, Sheeana Gangadao<sup>1</sup>, Yadav Bajagai<sup>1</sup>, Thi Thu Hao Van<sup>2</sup>, Robert J Moore<sup>2</sup> Dragana Stanley<sup>1,\*</sup>

<sup>1</sup>Institute for Future Farming Systems, Central Queensland University, Rockhampton, Queensland, Australia

<sup>2</sup>RMIT University, School of Science, Bundoora, Victoria 3083, Australia

\*Corresponding author  
E-mail: D.Stanley@cqu.edu.au

## **Supplementary Data**

### **Contents:**

Table A: Concentrations of vitamins and trace elements in enhanced LYHBHI media

Table B: Differentially abundant OTUs

Table C: Genera and OTUs Spearman correlated to acetic acid

Table D: Genera and OTUs Spearman correlated to butyric acid

Table E: OTUs Spearman correlated to carvacrol

**Table A: Concentrations of vitamins and trace elements in enhanced LYHBHI media.**

| <b>Ingredient</b>                | <b>Origin</b>        | <b>Conc µg/L</b> |
|----------------------------------|----------------------|------------------|
| Calcium (carbonate)              | Cenovis Multivitamin | 2.10E+01         |
| Riboflavine (Vit B2)             | Cenovis Multivitamin | 4.00E-01         |
| Thiamine Nitrate (B1)            | Cenovis Multivitamin | 4.00E-01         |
| Cyanocobalamin (B12)             | Cenovis Multivitamin | 5.00E-03         |
| Pyridoxine Hydrochloride (B6)    | Cenovis Multivitamin | 8.00E-01         |
| Nicotinamide (B3)                | Cenovis Multivitamin | 4.00E+00         |
| Calcium Panthoenate (B5)         | Cenovis Multivitamin | 2.20E+00         |
| Zinc (Oxide)                     | Cenovis Multivitamin | 1.50E+00         |
| Ascorbic acid                    | Cenovis Multivitamin | 4.50E+00         |
| Cod-liver oil                    | Cenovis Multivitamin | 1.75E+01         |
| Magnesium (oxide heavy)          | Cenovis Multivitamin | 1.50E+00         |
| Total Vit A                      | Cenovis Multivitamin | 5.93E-02         |
| dl-alpha-Tocopherol (Vit E 20IU) | Cenovis Multivitamin | 1.82E+00         |
| Iron (Ferrous Fumarate)          | Cenovis Multivitamin | 5.00E-01         |
| Folic acid                       | Cenovis Multivitamin | 3.00E-02         |
| Betacarotene                     | Cenovis Multivitamin | 1.20E-01         |
| Cholecalciferol (Vit D3 154IU)   | Cenovis Multivitamin | 3.85E-04         |
| Citrus Bioflavonoids Extract     | Cenovis Multivitamin | 2.00E-01         |
| Biotin (Vit H)                   | Cenovis Multivitamin | 1.50E-02         |
| Phytomenadine (Vit K1)           | Cenovis Multivitamin | 1.50E-03         |
| Iodine (Potassium Iodide)        | Cenovis Multivitamin | 1.50E-02         |

|                                   |                      |          |
|-----------------------------------|----------------------|----------|
| Copper (Cupric Sulfate Anhydrous) | Cenovis Multivitamin | 1.00E-01 |
| Chromium (Picolinate)             | Cenovis Multivitamin | 2.50E-03 |
| Manganese (Sulfate Monohydrate)   | Cenovis Multivitamin | 1.00E-01 |
| Selenium (Selenomethionine)       | Cenovis Multivitamin | 2.50E-03 |
| Boron (Boric acid)                | Cenovis Multivitamin | 3.00E-01 |
| Menaquinone 7-MK7                 | Caruso's             | 9.00E+00 |

**Table B: Differentially abundant OTUs.**

Positive Fold Change indicates fold higher in oregano, negative fold change represents fold reduced in oregano.

Multiple genera hits text in the table indicate blast hits with species from different genera with the same %ID, impossible to resolve on the current amplicon size.

Multiple sp. hits text in the table indicate blast hits with different species within the same genera that have the same %ID, impossible to resolve on the current amplicon size.

Uncult. bact. clone text in the table indicates number of hits to uncultured 16S bacterial gene sequences.

| OTUs<br>(GreenGenes taxonomy)          | p-val<br>(DESeq2) | Blastn hit            | Blast<br>% ID | Fold<br>Change |
|----------------------------------------|-------------------|-----------------------|---------------|----------------|
| <b><i>Lactobacillus</i> OTU 152229</b> | 2.70E-05          | <i>L. ingluviei</i>   | 100           | 34.14          |
| <b><i>Lactobacillus</i> OTU 272449</b> | 3.20E-05          | <i>L. acidophilus</i> | 100           | 12.3           |
| <b><i>Lactobacillus</i> OTU 104484</b> | 6.10E-05          | <i>L. ingluviei</i>   | 100           | 113100         |
| <b><i>Lactobacillus</i> OTU 119821</b> | 1.10E-04          | <i>L. johnsonii</i>   | 100           | 8.123          |
| <b>Lactobacillales OTU 33472</b>       | 3.40E-04          | Multiple genera hits  | 100           | 6.034          |
| <b><i>Lactobacillus</i> OTU 155425</b> | 4.90E-04          | <i>L. crispatus</i>   | 100           | 5.313          |
| <b><i>Lactobacillus</i> OTU 27332</b>  | 9.70E-04          | Uncult. bact. clone   | 98            | 73.79          |
| <b><i>Streptococcus</i> OTU 207140</b> | 1.00E-03          | Uncult. bact. clone   | 99            | -6.339         |
| <b><i>Pediococcus</i> OTU 284103</b>   | 1.10E-03          | Uncult. bact. clone   | 98            | 310100         |
| <b><i>Lactobacillus</i> OTU 251983</b> | 1.20E-03          | Uncult. bact. clone   | 98            | -6.113         |
| <b><i>Lactobacillus</i> OTU 266421</b> | 1.30E-03          | Uncult. bact. clone   | 97            | 7.378          |

| OTUs<br>(GreenGenes taxonomy)          | <i>p</i> -val<br>(DESeq2) | Blastn hit             | Blast<br>% ID | Fold<br>Change |
|----------------------------------------|---------------------------|------------------------|---------------|----------------|
| <i>Lactobacillus</i> OTU 170328        | 2.00E-03                  | <i>L. ingluviei</i>    | 96            | 6.261          |
| Lactobacillaceae OTU 101791            | 2.40E-03                  | Multiple genera hits   | 99            | 159300         |
| <i>Lactobacillus</i> OTU 17603         | 2.70E-03                  | <i>L. ingluviei</i>    | 100           | 5.941          |
| <i>Lactobacillus</i> OTU 80381         | 3.50E-03                  | Uncult. bact. clone    | 97            | 17.24          |
| <i>Lactobacillus</i> OTU 85290         | 4.00E-03                  | <i>L. reuteri</i>      | 97            | -9.651         |
| Enterobacteriaceae OTU<br>263876       | 4.30E-03                  | Uncult. bact. clone    | 95            | 7.036          |
| <i>Lactobacillus</i> OTU 169080        | 5.20E-03                  | Uncult. bact. clone    | 95            | 29700          |
| <i>Lactobacillus</i> OTU 76087         | 5.20E-03                  | Multiple genera hits   | 99            | 6.504          |
| <i>Lactobacillus</i> OTU 116794        | 6.10E-03                  | Uncult. bact. clone    | 97            | 26820          |
| <i>Streptococcus</i> OTU 136500        | 6.20E-03                  | Uncult. bact. clone    | 97            | -16.13         |
| Carnobacteriaceae OTU 9724             | 6.70E-03                  | Multiple genera hits   | 98            | 4.884          |
| <i>Streptococcus</i> OTU 167252        | 6.80E-03                  | Uncult. bact. clone    | 98            | -8.999         |
| <i>Lactobacillus</i> OTU 213664        | 7.40E-03                  | Uncult. bact. clone    | 98            | 9.258          |
| Streptococcaceae OTU<br>180394         | 7.60E-03                  | Uncult. bact. clone    | 96            | 30660          |
| <i>Lactobacillus</i> OTU 98212         | 8.50E-03                  | Uncult. bact. clone    | 96            | 36270          |
| <i>Enterococcus</i> OTU 123391         | 9.20E-03                  | Multiple genera hits   | 95            | 21240          |
| <i>Streptococcus</i> OTU 214315        | 9.20E-03                  | Uncult. bact. clone    | 98            | -5.219         |
| Streptococcaceae OTU 19535             | 9.80E-03                  | <i>S. anginosus</i>    | 97            | 5.146          |
| Lactobacillaceae OTU 21754             | 0.010                     | Uncult. bact. clone    | 97            | 55700          |
| <i>Lactobacillus</i> OTU 211163        | 0.010                     | Uncult. bact. clone    | 97            | 3.497          |
| <i>Lactobacillus</i> OTU 238976        | 0.010                     | Uncult. bact. clone    | 97            | -16.66         |
| Lactobacillaceae OTU 186446            | 0.011                     | Multiple genera hits   | 98            | 52220          |
| <i>L. manihotivorans</i> OTU<br>159388 | 0.011                     | Uncult. bact. clone    | 97            | 4.376          |
| <i>Lactobacillus</i> OTU 300049        | 0.011                     | Uncult. bact. clone    | 98            | 113.9          |
| Streptococcaceae OTU<br>182884         | 0.012                     | Uncult. bact. clone    | 96            | 9.836          |
| <i>L. coleohominis</i> OTU 224518      | 0.013                     | <i>L. coleohominis</i> | 100           | 2.939          |

| <b>OTUs<br/>(GreenGenes taxonomy)</b>             | <b>p-val<br/>(DESeq2)</b> | <b>Blastn hit</b>     | <b>Blast<br/>% ID</b> | <b>Fold<br/>Change</b> |
|---------------------------------------------------|---------------------------|-----------------------|-----------------------|------------------------|
| <b><i>Lactobacillus</i> OTU 228314</b>            | 0.013                     | Uncult. bact. clone   | 96                    | 10.44                  |
| <b><i>Lactobacillus</i> OTU 25404</b>             | 0.013                     | Multiple genera hits  | 96                    | 4.216                  |
| <b><i>Lactobacillus</i> OTU 225126</b>            | 0.014                     | <i>L. KC45b</i>       | 97                    | 44720                  |
| <b><i>Lactobacillus</i> OTU 88490</b>             | 0.014                     | <i>L. ingluviei</i>   | 97                    | 12.64                  |
| <b><i>Lactobacillus</i> OTU 71614</b>             | 0.015                     | Uncult. bact. clone   | 96                    | 8.038                  |
| <b><i>Streptococcus</i> OTU 97924</b>             | 0.015                     | Uncult. bact. clone   | 98                    | -6.752                 |
| <b><i>Lactobacillus</i> OTU 286390</b>            | 0.016                     | Uncult. bact. clone   | 97                    | 20270                  |
| <b><i>Lactobacillus</i> OTU 708</b>               | 0.016                     | <i>L. ingluviei</i>   | 97                    | 8.157                  |
| <b><i>Lactobacillus</i> OTU 123426</b>            | 0.017                     | Uncult. bact. clone   | 97                    | -20.05                 |
| <b><i>Enterococcus</i> OTU 38024</b>              | 0.019                     | Uncult. bact. clone   | 97                    | 2.222                  |
| <b><i>Lactobacillus</i> OTU 61159</b>             | 0.019                     | <i>L. ingluviei</i>   | 96                    | 21750                  |
| <b><i>Lactobacillus</i> OTU 145258</b>            | 0.021                     | Uncult. bact. clone   | 97                    | 6.821                  |
| <b><i>Lactobacillus</i> OTU 250410</b>            | 0.021                     | Uncult. bact. clone   | 99                    | 11.34                  |
| <b><i>Streptococcus</i> OTU 159558</b>            | 0.021                     | Uncult. bact. clone   | 97                    | -5.26                  |
| <b><i>Lactobacillus</i> OTU 192829</b>            | 0.023                     | Uncult. bact. clone   | 99                    | -4.384                 |
| <b><i>Lactobacillus</i> OTU 86477</b>             | 0.024                     | Uncult. bact. clone   | 98                    | -8.162                 |
| <b><i>Lactobacillus</i> OTU 151770</b>            | 0.025                     | <i>L. ingluviei</i>   | 97                    | 2.977                  |
| <b><i>Lactobacillus</i> OTU 158017</b>            | 0.025                     | Uncult. bact. clone   | 95                    | 31060                  |
| <b><i>Lactobacillus</i> OTU 269761</b>            | 0.025                     | Uncult. bact. clone   | 96                    | 30260                  |
| <b><i>Streptococcus</i> OTU 106153</b>            | 0.025                     | <i>S. macedonicus</i> | 100                   | -3.892                 |
| <b>Lactobacillaceae OTU 147775</b>                | 0.026                     | Uncult. bact. clone   | 96                    | 29460                  |
| <b>Lactobacillales OTU 278065</b>                 | 0.026                     | Uncult. bact. clone   | 98                    | 44.97                  |
| <b><i>Lactobacillus</i> OTU 174211</b>            | 0.027                     | <i>L. ingluviei</i>   | 97                    | 16530                  |
| <b><i>Streptococcus</i> OTU 82525</b>             | 0.027                     | Uncult. bact. clone   | 97                    | -5.678                 |
| <b><i>Lactobacillus agilis</i> OTU<br/>261200</b> | 0.028                     | <i>L. agilis</i>      | 99                    | -5.439                 |
| <b><i>Lactobacillus</i> OTU 56616</b>             | 0.028                     | Uncult. bact. clone   | 99                    | 3.656                  |
| <b><i>Streptococcus</i> OTU 237114</b>            | 0.029                     | Uncult. bact. clone   | 97                    | -8.107                 |
| <b><i>Lactobacillus</i> OTU 109663</b>            | 0.030                     | Uncult. bact. clone   | 98                    | 6.144                  |
| <b><i>Lactobacillus</i> OTU 258257</b>            | 0.030                     | Uncult. bact. clone   | 99                    | -20030                 |

| OTUs<br>(GreenGenes taxonomy)    | <i>p</i> -val<br>(DESeq2) | Blastn hit                                         | Blast<br>% ID | Fold<br>Change |
|----------------------------------|---------------------------|----------------------------------------------------|---------------|----------------|
| <i>Lactobacillus</i> OTU 275395  | 0.030                     | Uncult. bact. clone                                | 97            | 6.727          |
| <i>Streptococcus</i> OTU 144009  | 0.030                     | Uncult. bact. clone                                | 98            | -12.45         |
| <i>Streptococcus</i> OTU 61448   | 0.030                     | Uncult. bact. clone                                | 98            | -26380         |
| <i>Enterococcus</i> OTU 187731   | 0.031                     | Uncult. bact. clone                                | 98            | 2.284          |
| <i>Lactobacillus</i> OTU 174201  | 0.032                     | Uncult. bact. clone                                | 98            | 2.526          |
| <i>Lactobacillus</i> OTU 207893  | 0.033                     | Uncult. bact. clone                                | 98            | -24070         |
| <i>Lactobacillus</i> OTU 52161   | 0.033                     | Uncult. bact. clone                                | 98            | 2.42           |
| <i>Lactobacillus</i> OTU 60926   | 0.033                     | Uncult. bact. clone                                | 98            | 12780          |
| Enterobacteriaceae OTU<br>92136  | 0.033                     | Uncult. bact. clone                                | 96            | 4.642          |
| <i>Streptococcus</i> OTU 264005  | 0.037                     | Uncult. bact. clone                                | 99            | -6.379         |
| <i>Lactobacillus</i> OTU 192558  | 0.038                     | Uncult. bact. clone                                | 96            | 6.253          |
| <i>Streptococcus</i> OTU 4154    | 0.038                     | Uncult. bact. clone                                | 97            | -4.859         |
| <i>Lactobacillus</i> OTU 184772  | 0.039                     | Uncult. bact. clone                                | 92            | 11220          |
| <i>Enterococcus</i> OTU 175058   | 0.040                     | Multiple genera hits                               | 99            | 11420          |
| <i>Lactobacillus</i> OTU 34587   | 0.040                     | Uncult. bact. clone                                | 99            | 4.445          |
| <i>Lactobacillus</i> OTU 136182  | 0.041                     | Multiple sp. hits<br>( <i>Lactobacillus</i> )      | 97            | 4.301          |
| <i>Lactobacillus</i> OTU 263116  | 0.041                     | <i>L. reuteri</i>                                  | 97            | -4.942         |
| <i>Enterococcus</i> OTU 170058   | 0.042                     | Multiple genera hits                               | 96            | 5.834          |
| <i>Lactobacillus</i> OTU 154837  | 0.042                     | Uncult. bact. clone                                | 96            | 11030          |
| <i>Streptococcus</i> OTU 293956  | 0.042                     | Uncult. bact. clone                                | 98            | -5.861         |
| Enterobacteriaceae OTU<br>253114 | 0.042                     | Multiple sp. hits<br>( <i>Enterobacteriaceae</i> ) | 97            | 13740          |
| <i>Lactobacillus</i> OTU 226170  | 0.043                     | Uncult. bact. clone                                | 99            | 2.021          |
| <i>Lactobacillus</i> OTU 207731  | 0.044                     | Uncult. bact. clone                                | 99            | 10390          |
| <i>Streptococcus</i> OTU 122385  | 0.044                     | Uncult. bact. clone                                | 96            | -4.077         |
| <i>Lactobacillus</i> OTU 284267  | 0.045                     | Uncult. bact. clone                                | 95            | 7.555          |
| <i>Lactobacillus</i> OTU 126939  | 0.046                     | Uncult. bact. clone                                | 97            | 5.421          |
| <i>Lactobacillus</i> OTU 3668    | 0.046                     | <i>L. ingluviei</i>                                | 97            | 13770          |

| <b>OTUs<br/>(GreenGenes taxonomy)</b>  | <b><i>p</i>-val<br/>(DESeq2)</b> | <b>Blastn hit</b>   | <b>Blast<br/>% ID</b> | <b>Fold<br/>Change</b> |
|----------------------------------------|----------------------------------|---------------------|-----------------------|------------------------|
| <b><i>L. agilis</i> OTU 116383</b>     | 0.048                            | <i>L. agilis</i>    | 96                    | 11300                  |
| <b><i>Lactobacillus</i> OTU 9908</b>   | 0.048                            | Uncult. bact. clone | 95                    | 20080                  |
| <b><i>Lactobacillus</i> OTU 264260</b> | 0.049                            | Uncult. bact. clone | 96                    | -15460                 |

**Table C: Genera and OTUs Spearman correlated to acetic acid.**

Significant correlations for top 100 most abundant OTUs are shown.

Multiple genera hits text in the table indicate blast hits with species from different genera with the same %ID, impossible to resolve on the current amplicon size.

Uncult. bact. clone text in the table indicates number of hits to uncultured 16S bacterial gene sequences.

| <b>OTUs<br/>(GreenGenes taxonomy)</b>      | <b><i>p</i>-val</b> | <b>R</b> | <b>Blastn hit</b>   | <b>Blast<br/>% ID</b> |
|--------------------------------------------|---------------------|----------|---------------------|-----------------------|
| <b>Enterobacteriaceae OTU 271191</b>       | 1.70E-04            | 0.88     | Uncult. bact. clone | 96                    |
| <b>Enterobacteriaceae OTU 261461</b>       | 5.00E-04            | 0.85     | Uncult. bact. clone | 97                    |
| <b><i>Lactobacillus</i> OTU 200355</b>     | 6.30E-04            | 0.84     | Uncult. bact. clone | 98                    |
| <b><i>Enterococcus</i> OTU 15749</b>       | 1.00E-03            | 0.82     | <i>E. faecium</i>   | 100                   |
| <b><i>Enterococcus</i> OTU 55837</b>       | 1.70E-03            | 0.80     | Uncult. bact. clone | 98                    |
| <b><i>Enterococcus</i> OTU 11689</b>       | 1.80E-03            | 0.80     | Uncult. bact. clone | 97                    |
| <b>Enterobacteriaceae OTU 267130</b>       | 3.40E-03            | 0.77     | Uncult. bact. clone | 99                    |
| <b><i>Enterococcus</i> OTU 187731</b>      | 4.70E-03            | 0.75     | Uncult. bact. clone | 98                    |
| <b><i>Lactobacillus</i> OTU 17603</b>      | 5.30E-03            | -0.75    | <i>L. ingluviei</i> | 100                   |
| <b>Enterobacteriaceae OTU 146685</b>       | 5.30E-03            | 0.75     | Uncult. bact. clone | 98                    |
| <b>Enterobacteriaceae OTU 224864</b>       | 6.60E-03            | 0.73     | Uncult. bact. clone | 99                    |
| <b><i>Lactobacillus</i> OTU 35668</b>      | 0.010               | -0.71    | <i>L. marseille</i> | 98                    |
| <b>Enterobacteriaceae OTU 135153</b>       | 0.011               | 0.70     | <i>E. coli</i>      | 100                   |
| <b><i>Lactobacillus</i> OTU 203797</b>     | 0.014               | -0.69    | Uncult. bact. clone | 96                    |
| <b><i>Streptococcus</i> OTU 154406</b>     | 0.014               | -0.68    | Uncult. bact. clone | 98                    |
| <b><i>Lactobacillus</i> OTU 708</b>        | 0.015               | -0.68    | <i>L. ingluviei</i> | 97                    |
| <b><i>Lactobacillus</i> OTU 109663</b>     | 0.020               | -0.66    | Uncult. bact. clone | 98                    |
| <b><i>Enterococcus</i> OTU 264003</b>      | 0.021               | 0.66     | Uncult. bact. clone | 98                    |
| <b><i>L. manihotivorans</i> OTU 159388</b> | 0.021               | -0.66    | Uncult. bact. clone | 97                    |
| <b>Enterobacteriaceae OTU 183643</b>       | 0.023               | 0.65     | Uncult. bact. clone | 100                   |
| <b><i>Lactobacillus</i> OTU 76947</b>      | 0.024               | 0.64     | Uncult. bact. clone | 97                    |
| <b><i>S. alactolyticus</i> OTU 147828</b>  | 0.024               | 0.64     | Uncult. bact. clone | 99                    |



| OTUs<br>(GreenGenes taxonomy)           | <i>p</i> -val | R     | Blastn hit          | Blast<br>% ID |
|-----------------------------------------|---------------|-------|---------------------|---------------|
| <i>Lactobacillus</i> OTU 148643         | 0.025         | -0.64 | <i>L. johnsonii</i> | 100           |
| <i>L. manihotivorans</i> OTU 198669     | 0.026         | 0.64  | Uncult. bact. clone | 98            |
| <i>Lactobacillus</i> OTU 151770         | 0.027         | -0.63 | <i>L. ingluviei</i> | 97            |
| <i>Lactobacillus</i> OTU 52161          | 0.035         | 0.61  | Uncult. bact. clone | 98            |
| <i>Lactobacillus</i> OTU 92052          | 0.035         | -0.61 | Uncult. bact. clone | 99            |
| <i>Lactobacillus</i> OTU 1550           | 0.038         | -0.60 | <i>L. KC45b</i>     | 97            |
| Streptococcaceae OTU 233731             | 0.040         | -0.60 | Uncult. bact. clone | 99            |
| <i>L. coleohominis</i> OTU 224518       | 0.040         | -0.60 | Uncult. bact. clone | 100           |
| <i>Lactobacillus</i> OTU 287135         | 0.041         | -0.60 | Uncult. bact. clone | 100           |
| <i>Lactobacillus</i> OTU 44522          | 0.042         | -0.59 | Uncult. bact. clone | 99            |
| <i>Lactobacillus</i> OTU 1270           | 0.050         | -0.58 | Uncult. bact. clone | 98            |
| <b>GENERA</b>                           |               |       |                     |               |
| <i>Enterococcus</i>                     | 2.20E-04      | 0.87  | -                   | -             |
| <i>Ruminococcus</i>                     | 4.00E-04      | 0.85  | -                   | -             |
| <b>Unclassified Coriobacteriaceae</b>   | 8.20E-04      | 0.83  | -                   | -             |
| <b>Unclassified Burkholderiales</b>     | 4.50E-03      | 0.75  | -                   | -             |
| <i>Proteus</i>                          | 5.50E-03      | 0.74  | -                   | -             |
| <b>Unclassified Betaproteobacteria</b>  | 5.70E-03      | 0.74  | -                   | -             |
| <i>Coprobacillus</i>                    | 8.50E-03      | 0.72  | -                   | -             |
| <i>Bacteroides</i>                      | 9.60E-03      | 0.71  | -                   | -             |
| <b>Unclassified Enterobacteriaceae</b>  | 0.011         | 0.70  | -                   | -             |
| <i>Sutterella</i>                       | 0.012         | 0.69  | -                   | -             |
| <i>Clostridium</i>                      | 0.015         | -0.68 | -                   | -             |
| <b>Unclassified Enterococcaceae</b>     | 0.017         | 0.67  | -                   | -             |
| <b>Unclassified Erysipelotrichaceae</b> | 0.019         | 0.66  | -                   | -             |
| <i>Bifidobacterium</i>                  | 0.025         | 0.64  | -                   | -             |
| <i>Collinsella</i>                      | 0.028         | 0.63  | -                   | -             |
| <b>Unclassified Ruminococcaceae</b>     | 0.032         | 0.62  | -                   | -             |
| <b>Unclassified Pseudomonadaceae</b>    | 0.040         | 0.60  | -                   | -             |

**Table D: Genera and OTUs Spearman correlated to butyric acid.**

Significant correlations for top 100 most abundant OTUs are shown.

Multiple genera hits text in the table indicate blast hits with species from different genera with the same %ID, impossible to resolve on the current amplicon size.

Uncult. bact. clone text in the table indicates number of hits to uncultured 16S bacterial gene sequences.

| OTUs<br>(GreenGenes taxonomy)             | <i>p</i> -val | R     | Blastn hit                                    | Blast<br>% ID |
|-------------------------------------------|---------------|-------|-----------------------------------------------|---------------|
| <b>Enterobacteriaceae OTU 261461</b>      | 3.20E-04      | 0.86  | Uncult. bact. clone                           | 99            |
| <b>Enterobacteriaceae OTU 271191</b>      | 5.80E-04      | 0.84  | Uncult. bact. clone                           | 96            |
| <b><i>Lactobacillus</i> OTU 200355</b>    | 1.10E-03      | 0.82  | Uncult. bact. clone                           | 98            |
| <b><i>Enterococcus</i> OTU 55837</b>      | 1.30E-03      | 0.81  | Uncult. bact. clone                           | 98            |
| <b><i>Enterococcus</i> OTU 187731</b>     | 1.60E-03      | 0.80  | Uncult. bact. clone                           | 98            |
| <b><i>Enterococcus</i> OTU 15749</b>      | 1.80E-03      | 0.80  | <i>E. Faecium</i>                             | 100           |
| <b><i>Enterococcus</i> OTU 11689</b>      | 4.30E-03      | 0.76  | Uncult. bact. clone                           | 98            |
| <b>Enterobacteriaceae OTU 267130</b>      | 6.30E-03      | 0.74  | Uncult. bact. clone                           | 99            |
| <b><i>Lactobacillus</i> OTU 76947</b>     | 6.90E-03      | 0.73  | Uncult. bact. clone                           | 95            |
| <b>Enterobacteriaceae OTU 146685</b>      | 7.00E-03      | 0.73  | Uncult. bact. clone                           | 98            |
| <b><i>Lactobacillus</i> OTU 17603</b>     | 9.00E-03      | -0.71 | <i>L. ingluviei</i>                           | 100           |
| <b>Enterobacteriaceae OTU 224864</b>      | 0.011         | 0.70  | Uncult. bact. clone                           | 99            |
| <b><i>Enterococcus</i> OTU 264003</b>     | 0.012         | 0.70  | Uncult. bact. clone                           | 98            |
| <b>Enterobacteriaceae OTU 135153</b>      | 0.014         | 0.69  | <i>E. coli</i>                                | 99            |
| <b><i>Lactobacillus</i> OTU 35668</b>     | 0.015         | -0.68 | Multiple sp. hits<br>( <i>Lactobacillus</i> ) | 98            |
| <b><i>S. alactolyticus</i> OTU 147828</b> | 0.018         | 0.67  | Uncult. bact. clone                           | 99            |
| <b><i>Lactobacillus</i> OTU 109663</b>    | 0.021         | -0.65 | Uncult. bact. clone                           | 99            |
| <b>Enterobacteriaceae OTU 183643</b>      | 0.021         | 0.65  | Uncult. bact. clone                           | 98            |
| <b><i>L. manihotorans</i> OTU 198669</b>  | 0.028         | 0.63  | Uncult. bact. clone                           | 98            |
| <b><i>Lactobacillus</i> OTU 52161</b>     | 0.028         | 0.63  | Uncult. bact. clone                           | 98            |
| <b><i>Lactobacillus</i> OTU 203797</b>    | 0.034         | -0.61 | Uncult. bact. clone                           | 96            |
| <b><i>Lactobacillus</i> OTU 151770</b>    | 0.034         | -0.61 | <i>L. ingluviei</i> JCM 12531                 | 97            |

| OTUs<br>(GreenGenes taxonomy)       | <i>p</i> -val | R     | Blastn hit           | Blast<br>% ID |
|-------------------------------------|---------------|-------|----------------------|---------------|
| <i>Enterococcus</i> OTU 93226       | 0.035         | 0.61  | <i>L. ingluviei</i>  | 97            |
| <i>Lactobacillus</i> OTU 708        | 0.036         | -0.61 | Uncult. bact. clone  | 97            |
| <i>L. manihotivorans</i> OTU 159388 | 0.038         | -0.60 | Multiple genera hits | 100           |
| <i>Lactobacillus</i> OTU 148643     | 0.040         | -0.60 | Uncult. bact. clone  | 97            |
| Streptococcaceae OTU 233731         | 0.041         | -0.60 | Uncult. bact. clone  | 99            |
| <i>Lactobacillus</i> OTU 92052      | 0.043         | -0.59 | Uncult. bact. clone  | 99            |
| <i>Lactobacillus</i> OTU 66484      | 0.044         | 0.59  | Uncult. bact. clone  | 97            |
| <i>Lactobacillus</i> OTU 1550       | 0.046         | -0.58 | <i>L. KC45b</i>      | 97            |
| <i>Lactobacillus</i> OTU 44522      | 0.046         | -0.59 | Uncult. bact. clone  | 99            |
| <b>GENERA</b>                       |               |       |                      |               |
| <i>Enterococcus</i>                 | 5.00E-04      | 0.85  | -                    | -             |
| <i>Ruminococcus</i>                 | 1.50E-03      | 0.81  | -                    | -             |
| Unclassified Coriobacteriaceae      | 2.70E-03      | 0.78  | -                    | -             |
| Unclassified Burkholderiales        | 5.20E-03      | 0.75  | -                    | -             |
| <i>Proteus</i>                      | 5.90E-03      | 0.74  | -                    | -             |
| <i>Coprobacillus</i>                | 6.50E-03      | 0.73  | -                    | -             |
| <i>Sutterella</i>                   | 6.80E-03      | 0.73  | -                    | -             |
| <i>Bacteroides</i>                  | 0.012         | 0.69  | -                    | -             |
| Unclassified Betaproteobacteria     | 0.013         | 0.69  | -                    | -             |
| Unclassified Enterobacteriaceae     | 0.014         | 0.69  | -                    | -             |
| <i>Clostridium</i>                  | 0.017         | -0.67 | -                    | -             |
| Unclassified Enterococcaceae        | 0.023         | 0.65  | -                    | -             |
| Unclassified Ruminococcaceae        | 0.032         | 0.62  | -                    | -             |

**Table E: OTUs Spearman correlated to carvacrol.**

Significant correlations for top 100 most abundant OTUs are shown. There were no genera significantly correlated with carvacrol.

Multiple genera hits text in the table indicate blast hits with species from different genera with the same %ID, impossible to resolve on the current amplicon size.

Uncult. bact. clone text in the table indicates number of hits to uncultured 16S bacterial gene sequences.

| OTUs<br>(GreenGenes taxonomy)          | <i>p</i> -val | R     | Blastn hit          | Blast<br>% ID |
|----------------------------------------|---------------|-------|---------------------|---------------|
| <i>Lactobacillus</i> OTU 192829        | 6.30E-04      | -0.84 | Uncult. bact. clone | 99            |
| <i>Lactobacillus</i> OTU 152229        | 1.20E-03      | 0.82  | Uncult. bact. clone | 97            |
| <i>Streptococcus</i> OTU 214315        | 1.60E-03      | -0.80 | Uncult. bact. clone | 98            |
| <i>Lactobacillus</i> OTU 251983        | 5.20E-03      | -0.75 | Uncult. bact. clone | 98            |
| <i>Streptococcus</i> OTU 207140        | 6.40E-03      | -0.74 | Uncult. bact. clone | 99            |
| <i>Streptococcus</i> OTU 230511        | 0.011         | -0.70 | Uncult. bact. clone | 99            |
| <i>L. manihotivorans</i> OTU<br>159388 | 0.012         | 0.69  | Uncult. bact. clone | 97            |
| <i>Lactobacillus</i> OTU 119821        | 0.014         | 0.68  | <i>L. KC38</i>      | 99            |
| <i>Lactobacillus</i> OTU 85290         | 0.016         | -0.67 | Uncult. bact. clone | 97            |
| <i>Streptococcus</i> OTU 52564         | 0.019         | -0.66 | Uncult. bact. clone | 98            |
| Lactobacillales OTU 33472              | 0.019         | 0.66  | Uncult. bact. clone | 99            |
| <i>Streptococcus</i> OTU 122385        | 0.023         | -0.65 | Uncult. bact. clone | 96            |
| <i>Lactobacillus</i> OTU 272449        | 0.026         | 0.64  | Uncult. bact. clone | 99            |
| <i>Streptococcus</i> OTU 159558        | 0.035         | -0.61 | Uncult. bact. clone | 99            |
| <i>Lactobacillus</i> OTU 92052         | 0.038         | 0.60  | Uncult. bact. clone | 99            |
| <i>Lactobacillus</i> OTU 1550          | 0.039         | 0.60  | <i>L. KC45b</i>     | 97            |
